CORRECTION

# Correction: The Exploration-Exploitation Dilemma: A Multidisciplinary Framework

The *PLOS ONE* Staff

In the Methods section, there is an error in the first equation in the first paragraph. Please view the complete, correct equation here:

$$\frac{dE}{dt} = \frac{f_{\max}L}{K_L + L} - m - u(t), \frac{dL}{dt} = \alpha u(t) - m_L L$$

## Reference

1. Berger-Tal O, Nathan J, Meron E, Saltz D (2014) The Exploration-Exploitation Dilemma: A Multidisciplinary Framework. *PLoS ONE* 9(4): e95693. doi:[10.1371/journal.pone.0095693](https://doi.org/10.1371/journal.pone.0095693) PMID: [24756026](https://pubmed.ncbi.nlm.nih.gov/24756026/)

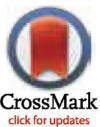

## OPEN ACCESS

**Citation:** The *PLOS ONE* Staff (2015) Correction: The Exploration-Exploitation Dilemma: A Multidisciplinary Framework. *PLoS ONE* 10(3): e0119116. doi:[10.1371/journal.pone.0119116](https://doi.org/10.1371/journal.pone.0119116)

**Published:** March 5, 2015

**Copyright:** © 2015 The PLOS ONE Staff. This is an open access article distributed under the terms of the [Creative Commons Attribution License](https://creativecommons.org/licenses/by/4.0/), which permits unrestricted use, distribution, and reproduction in any medium, provided the original author and source are credited.
